# Supplementary material
Source: PubMed Central journal article supplement (PMC7577185)
Supplement: mmc1.pdf [file mmc1.pdf]

**Supplementary Table 1: Comparison of (i) participants who completed at least one EMA compared to baseline online, and (ii) participants who provided sensor data compared to participants who did not provide sensor data.**

| Characteristics                          | Completed at least one EMAs |                    | p-value | Sensor data provide of those completed at least one EMAs |                    | p-value            |
|------------------------------------------|-----------------------------|--------------------|---------|----------------------------------------------------------|--------------------|--------------------|
|                                          | Yes (N=582)                 | No (N=713)         |         | Yes (N=515)                                              | No (N=67)          |                    |
| <b>Gender</b>                            |                             |                    |         |                                                          |                    |                    |
| Male                                     | 102(17.99)                  | 126(17.85)         |         | 92(18.36)                                                | 10(15.15)          |                    |
| Female                                   | 465(82.01)                  | 580(82.15)         | 0.947   | 409(81.64)                                               | 56(84.85)          | 0.523              |
| <b>Age<sup>b</sup></b>                   |                             |                    |         |                                                          |                    |                    |
| <b>median (IQR)</b>                      | 17(16,18)                   | 17(16,18)          | 0.228   | 17(16,18)                                                | 17(16,18)          | 0.154              |
| <b>Body Mass Index (BMI)<sup>b</sup></b> |                             |                    |         |                                                          |                    |                    |
| <b>median (IQR)</b>                      | 22.17(20.08,24.955)         | 22.47(19.96,25.71) | 0.593   | 22.12(20.08,24.91)                                       | 22.25(20.08,25.04) | 0.688              |
| <b>Body Mass Index (BMI)</b>             |                             |                    |         |                                                          |                    |                    |
| Underweight                              | 34(6.06)                    | 62(9.24)           |         | 33(6.65)                                                 | 1(1.54)            |                    |
| Normal                                   | 372(66.31)                  | 394(58.72)         |         | 329(66.33)                                               | 43(66.15)          |                    |
| Overweight                               | 103(18.36)                  | 143(21.31)         |         | 91(18.35)                                                | 12(18.46)          |                    |
| Obese                                    | 52(9.27)                    | 72(10.73)          | 0.032   | 43(8.67)                                                 | 9(13.85)           | 0.246              |
| <b>Year of school</b>                    |                             |                    |         |                                                          |                    |                    |
| Year 7                                   | 2(0.34)                     | 0(0)               |         | 2(0.39)                                                  | 0(0)               |                    |
| Year 8                                   | 11(1.89)                    | 19(2.66)           |         | 10(1.94)                                                 | 1(1.49)            |                    |
| Year 9                                   | 30(5.15)                    | 44(6.17)           |         | 27(5.24)                                                 | 3(4.48)            |                    |
| Year 10                                  | 78(13.4)                    | 84(11.78)          |         | 71(13.79)                                                | 7(10.45)           |                    |
| Year 11                                  | 57(9.79)                    | 44(6.17)           |         | 48(9.32)                                                 | 9(13.43)           |                    |
| Year 12                                  | 131(22.51)                  | 149(20.9)          |         | 118(22.91)                                               | 13(19.4)           |                    |
| Not at school                            | 25(4.3)                     | 22(3.09)           |         | 23(4.47)                                                 | 2(2.99)            |                    |
| Finished school                          | 248(42.61)                  | 351(49.23)         | 0.041   | 216(41.94)                                               | 32(47.76)          | 0.906 <sup>a</sup> |
| <b>Trade certificate</b>                 |                             |                    |         |                                                          |                    |                    |
| No                                       | 229(83.88)                  | 296(79.57)         |         | 201(84.1)                                                | 28(82.35)          |                    |
| Yes                                      | 44(16.12)                   | 76(20.43)          | 0.164   | 38(15.9)                                                 | 6(17.65)           | 0.795              |
| <b>Work at a job</b>                     |                             |                    |         |                                                          |                    |                    |
| No                                       | 246(42.49)                  | 293(41.27)         |         | 218(42.58)                                               | 28(41.79)          |                    |
| Yes                                      | 333(57.51)                  | 417(58.73)         | 0.659   | 294(57.42)                                               | 39(58.21)          | 0.902              |
| <b>Looking for a job</b>                 |                             |                    |         |                                                          |                    |                    |
| No                                       | 105(42.68)                  | 115(39.25)         |         | 92(42.2)                                                 | 13(46.43)          |                    |
| Yes                                      | 141(57.32)                  | 178(60.75)         | 0.419   | 126(57.8)                                                | 15(53.57)          | 0.670              |
| <b>Work for salary</b>                   |                             |                    |         |                                                          |                    |                    |
| No                                       | 31(9.31)                    | 47(11.27)          |         | 28(9.52)                                                 | 3(7.69)            |                    |
| Yes                                      | 302(90.69)                  | 370(88.73)         | 0.382   | 266(90.48)                                               | 36(92.31)          | 0.495 <sup>a</sup> |
| <b>Weekly work hours<sup>b</sup></b>     |                             |                    |         |                                                          |                    |                    |
| <b>median (IQR)</b>                      | 10(6,20)                    | 12(8,20)           | 0.062   | 10(6,20)                                                 | 12(7,20)           | 0.289              |
| <b>Language at home</b>                  |                             |                    |         |                                                          |                    |                    |
| English                                  | 503(86.43)                  | 594(83.54)         |         | 442(85.83)                                               | 61(91.04)          |                    |
| Other                                    | 79(13.57)                   | 117(16.46)         | 0.151   | 73(14.17)                                                | 6(8.96)            | 0.241              |

*Note: a- Fishers exact test was employed to derive p-values; b- Mann Whitney U test was employed to derive p-values; Chi-square test was employed to derive p-values for all other variables. Three individuals were excluded as they were recruited before 8<sup>th</sup> of Nov 2019.*

**Supplementary Table 2: Comparison of participants who completed Ecological Momentary Assessments (EMAs) pre- and post-implementation of the physical distancing policy.**

| Characteristics         |                 | Pre (N=582)        | After (N=128)      | P-value |
|-------------------------|-----------------|--------------------|--------------------|---------|
| Age *                   | median (IQR)    | 17(16,18)          | 17(16,18)          | 0.7511  |
| Body Mass Index (BMI) * | median (IQR)    | 22.17(20.08,24.96) | 22.13(19.96,25.04) | 0.9611  |
| Gender                  | Male            | 102(17.99)         | 23(19.01)          | 0.7706  |
|                         | Female          | 465(82.01)         | 98(80.99)          |         |
| Body Mass Index (BMI)   | Underweight     | 34(6.06)           | 8(6.5)             | 0.6845  |
|                         | Normal          | 372(66.31)         | 79(64.23)          |         |
|                         | Overweight      | 103(18.36)         | 27(21.95)          |         |
|                         | Obese           | 52(9.27)           | 9(7.32)            |         |
| Year of school          | Year 7          | 2(0.34)            | 2(1.56)            | 0.1913  |
|                         | Year 8          | 11(1.89)           | 3(2.34)            |         |
|                         | Year 9          | 30(5.15)           | 6(4.69)            |         |
|                         | Year 10         | 78(13.4)           | 13(10.16)          |         |
|                         | Year 11         | 57(9.79)           | 10(7.81)           |         |
|                         | Year 12         | 131(22.51)         | 32(25)             |         |
|                         | Not at school   | 25(4.3)            | 9(7.03)            |         |
|                         | Finished school | 248(42.61)         | 53(41.41)          |         |
| Trade certificate       | No              | 229(83.88)         | 53(85.48)          | 0.7313  |
|                         | Yes             | 44(16.12)          | 9(14.52)           |         |
| Work at a job           | No              | 246(42.49)         | 64(50)             | 0.0856  |
|                         | Yes             | 333(57.51)         | 64(50)             |         |
| Looking for a job       | No              | 105(42.68)         | 23(35.94)          | 0.2755  |
|                         | Yes             | 141(57.32)         | 41(64.06)          |         |
| Work for salary         | No              | 31(9.31)           | 6(9.38)            | 0.9857  |
|                         | Yes             | 302(90.69)         | 58(90.63)          |         |
| Weekly work hours*      | median (IQR)    | 10(6,20)           | 10(6,15)           | 0.4658  |
| Language at home        | English         | 503(86.43)         | 107(83.59)         | 0.3488  |
|                         | Other           | 79(13.57)          | 21(16.41)          |         |
| K6 score*               | median (IQR)    | 16(12,20)          | 16(12,20)          | 0.5884  |

Note: Chi-square goodness of fit test was used to compare categorical variables to derive p-values; \* Wilcoxon-Mann-Whitney test was used to derive p-values.

## **Mental Health: Kessler-6**

[Mewton L, Kessler RC, Slade T, Hobbs MJ, Brownhill L, Birrell L, Tonks Z, Teesson M, Newton N, Chapman C, Allsop S. The psychometric properties of the Kessler Psychological Distress Scale (K6) in a general population sample of adolescents. Psychological assessment. 2016 Oct;28(10):1232.]

Note: Answer options are 'None of the time', 'A little of the time', 'Some of the time', 'Most of the time', 'All of the time'.

### **Questions about your mental health and wellbeing**

These questions concern how you have been feeling over the past 30 days. In the last FOUR WEEKS, about how often:

- C1. Did you feel nervous?
- C2. Did you feel hopeless?
- C3. Did you feel restless or fidgety?
- C4. Did you feel so sad that nothing could cheer you up?
- C5. Did you feel that everything was an effort?
- C6. Did you feel worthless?

## **The EPOCH Measure of Adolescent Well-being**

[Kern ML, Benson L, Steinberg EA, Steinberg L. The EPOCH measure of adolescent well-being. Psychological assessment. 2016 May;28(5):586.]

[Note: Suffix to question numbers below relate to each domain of wellbeing: E - 'Engagement', P - 'Perserverance', O - 'Optimism', C - 'Connectedness', H - 'Happiness']

Note: Answer options are 'Almost never', 'Sometimes', 'Often', 'Very often', 'Almost always'

### **Questions about your mental health and wellbeing**

This is a survey about you! Please read each of the following statements.

Circle how much each statement describes you. Please be honest - there are no right or wrong answers.

- 1\_C1 When something good happens to me, I have people who I like to share the good news with.
- 2\_P1 I finish whatever I begin.
- 3\_O1 I am optimistic about my future
- 4\_H1 I feel happy.
- 5\_E1 When I do an activity, I enjoy it so much that I lose track of time.
- 6\_H2 I have a lot of fun.
- 7\_E2 I get completely absorbed in what I am doing.
- 8\_H3 I love life.
- 9\_P2 I keep at my schoolwork until I am done with it.
- 10\_C2 When I have a problem, I have someone who will be there for me.
- 11\_E3 I get so involved in activities that I forget about everything else.
- 12\_E4 When I am learning something new, I lose track of how much time has passed.
- 13\_O2 In uncertain times, I expect the best.
- 14\_C3 There are people in my life who really care about me.
- 15\_O3 I think good things are going to happen to me.
- 16\_C4 I have friends that I really care about.
- 17\_P3 Once I make a plan to get something done, I stick to it.
- 18\_O4 I believe that things will work out, no matter how difficult they seem.
- 19\_P4 I am a hard worker.
- 20\_H4 I am a cheerful person
